# Supplementary material for: The Temporal Evolution and Global Spread of Cauliflower mosaic virus, a Plant Pararetrovirus
Source: PubMed Central journal article supplement (PMC3897471; doi:10.1371/journal.pone.0085641), 2014-01-21
Supplement: pone.0085641.s001.pdf [file pone.0085641.s001.pdf]

A ORFs I-V

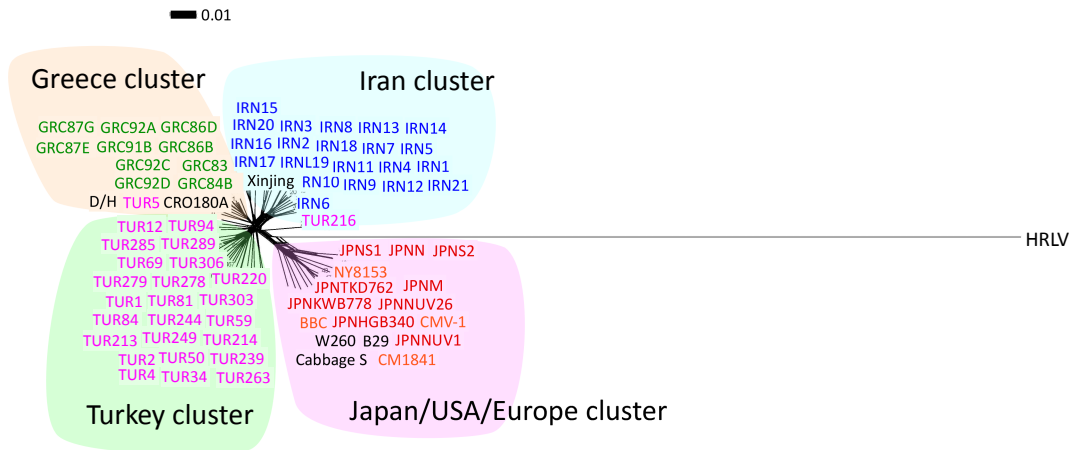

B ORF VI

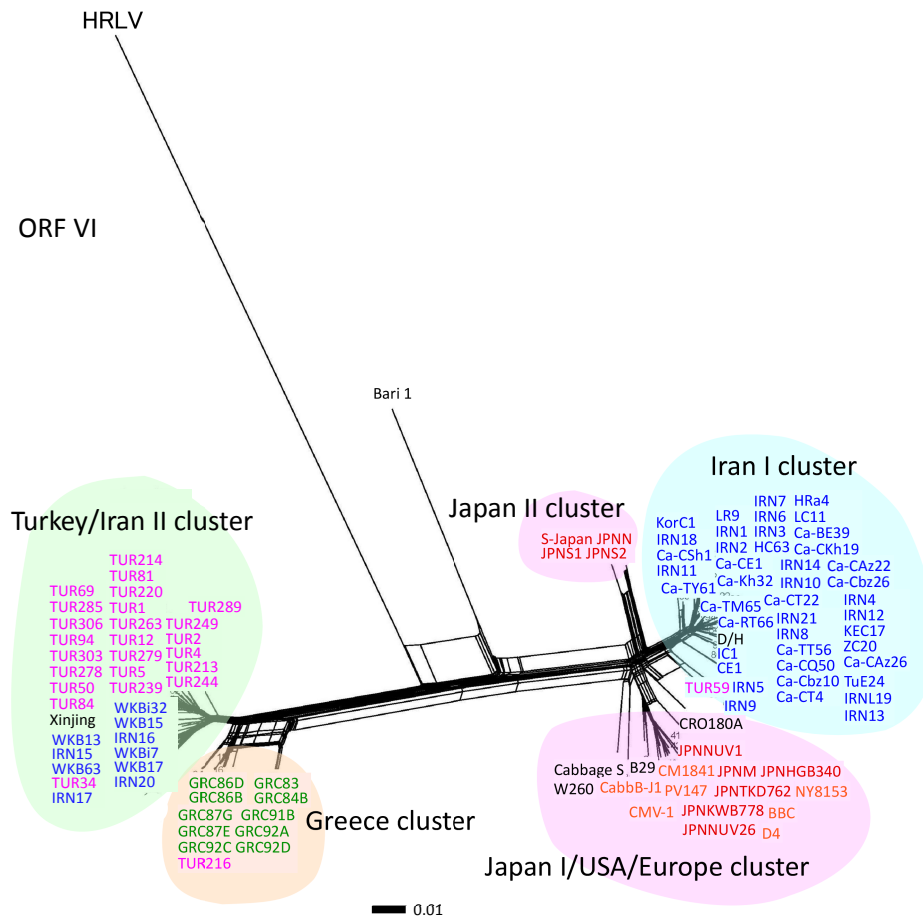

Figure S1

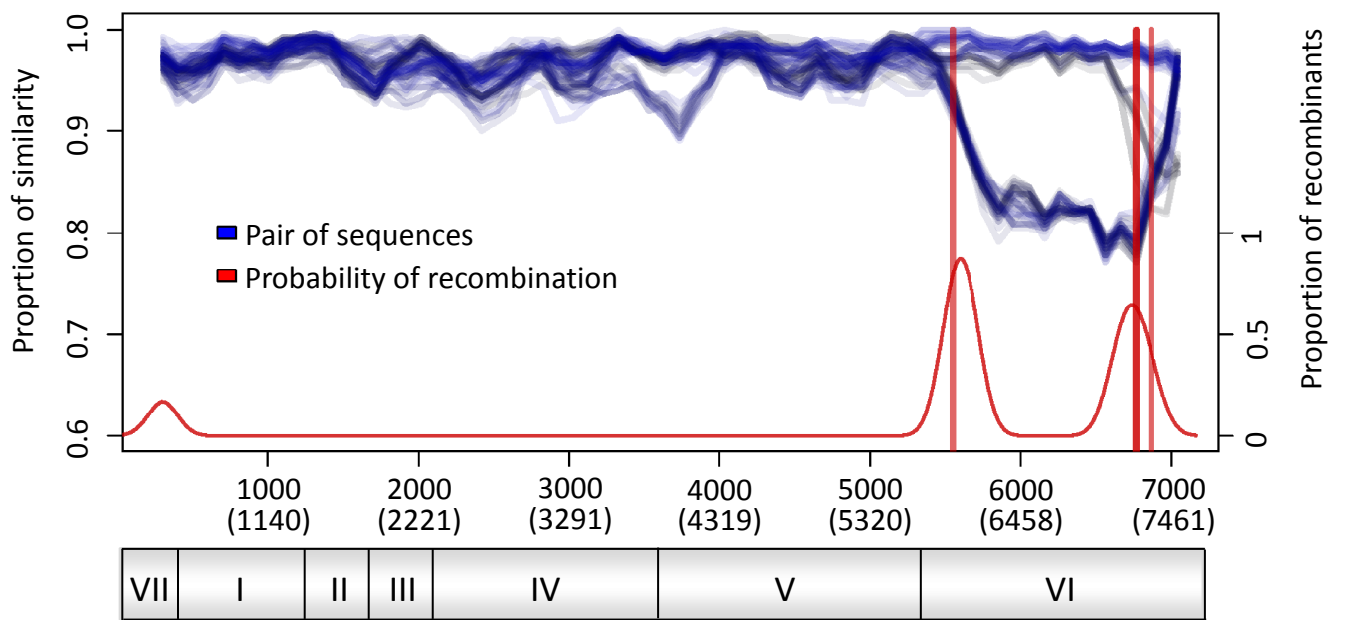

Figure S2

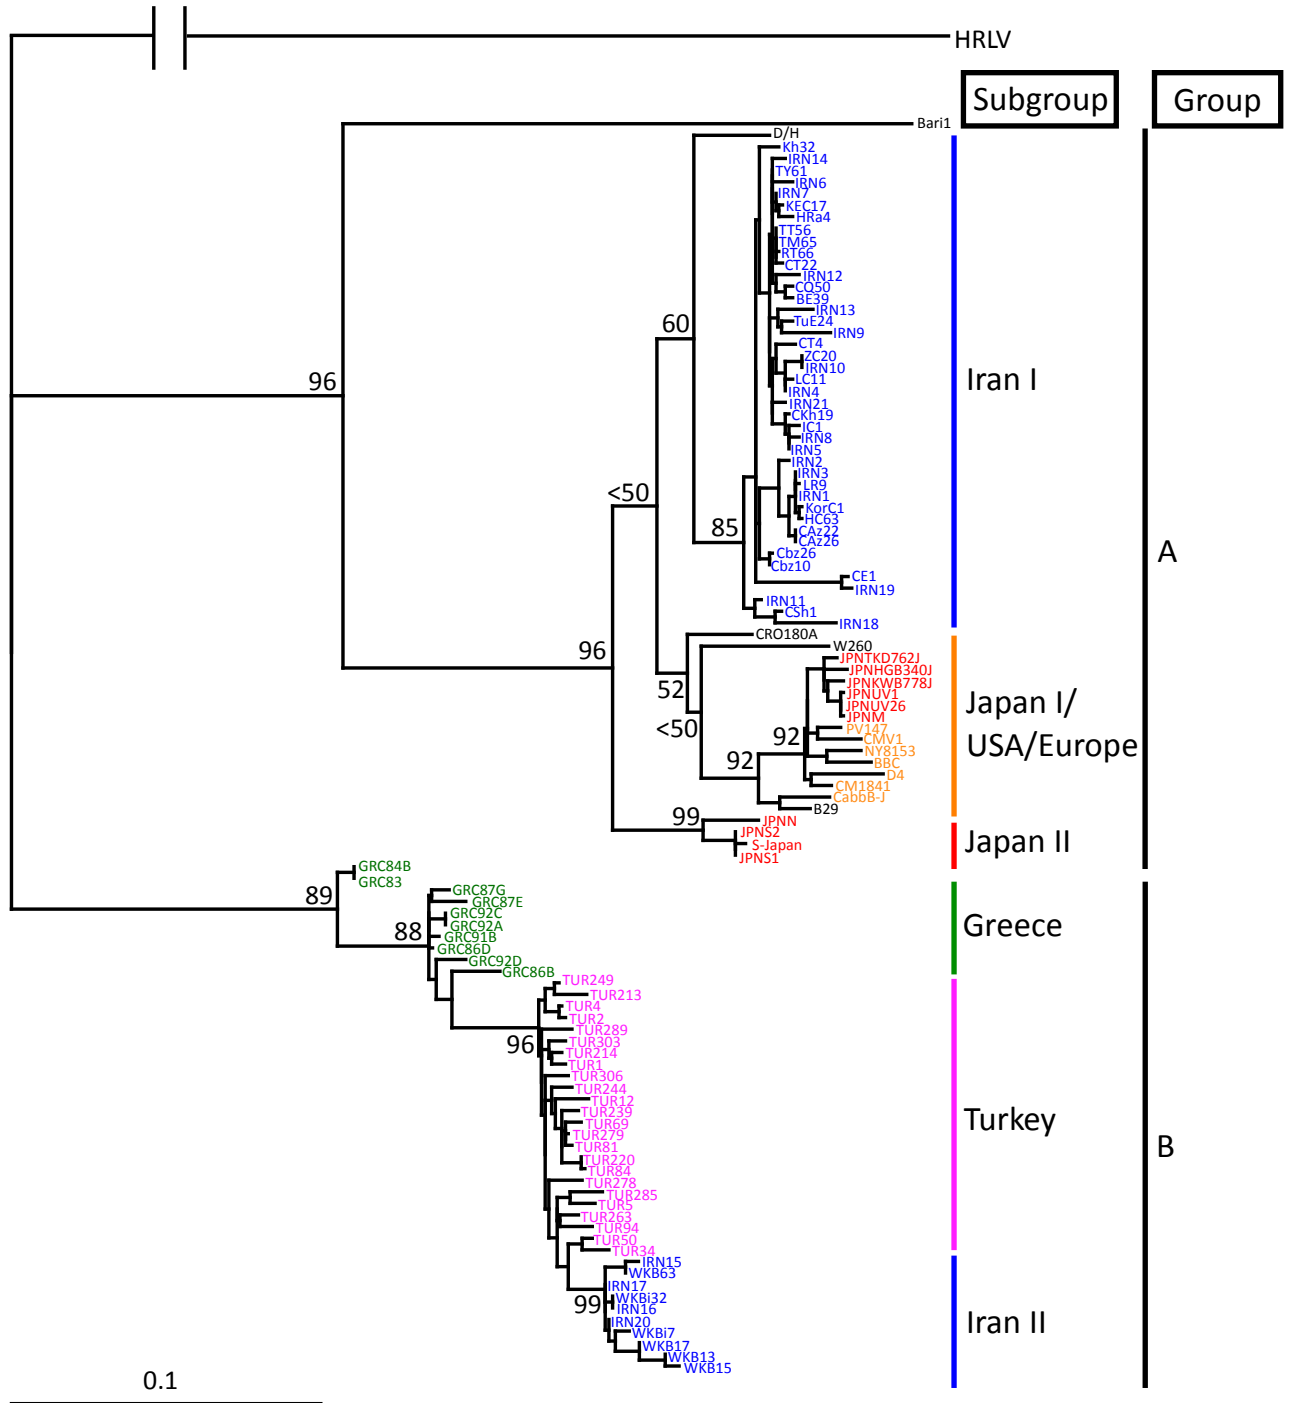

Figure S3

A ORFs I-V

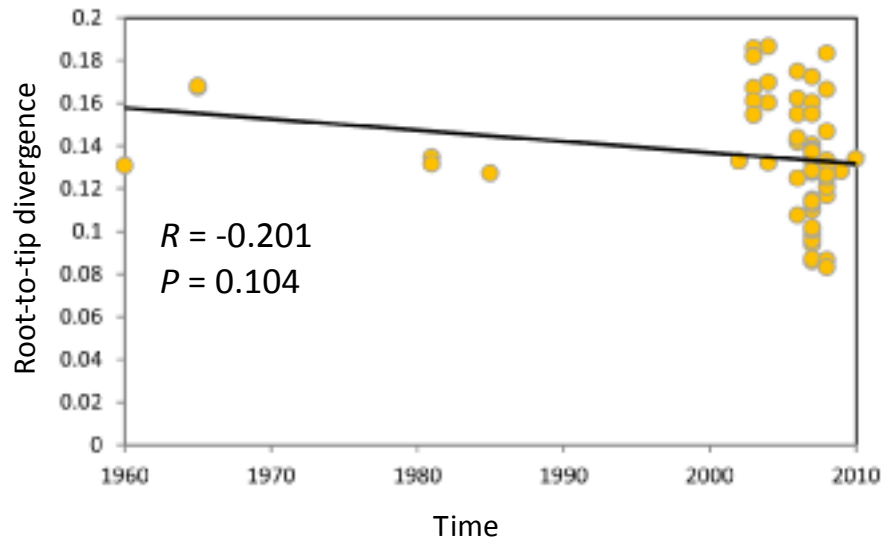

B ORF VI

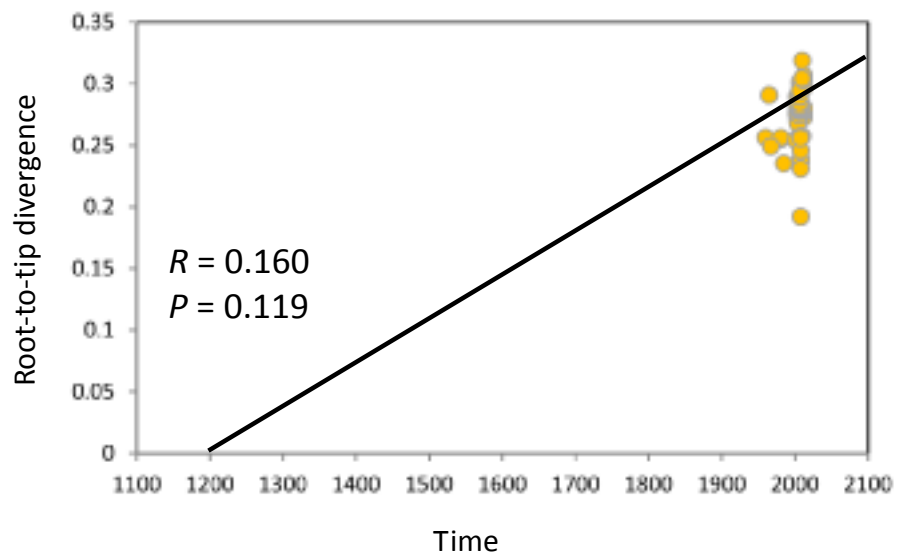

Figure S4

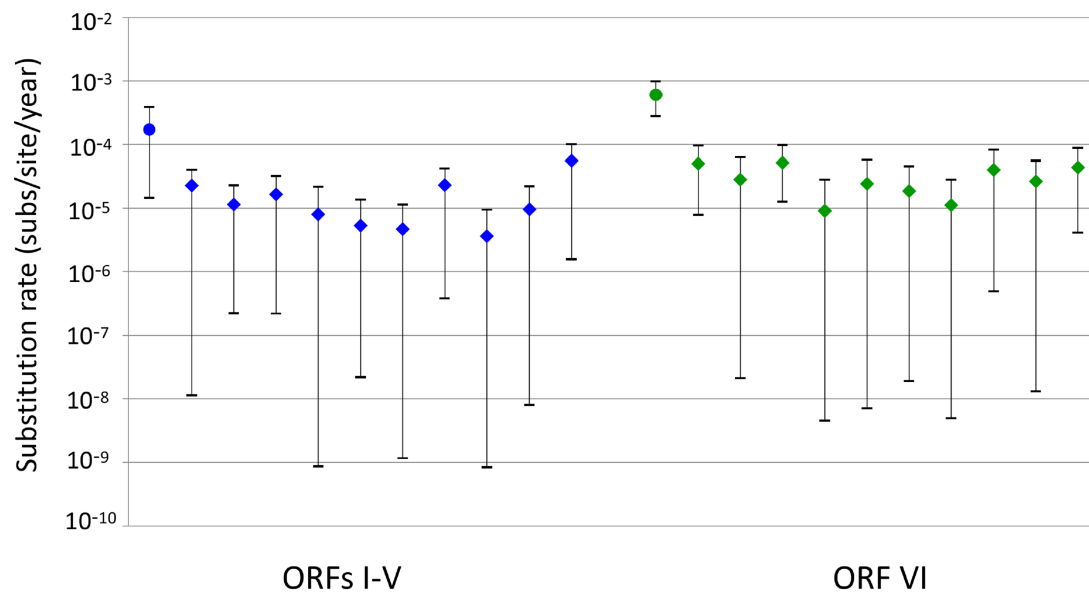

Figure S5

Table S1. *Cauliflower mosaic virus* isolates analyzed in this study.

| Isolate      | Original host                             | Common name            | Location (city, district)     | Year of collection | Reference  | Sequenced region or Accession no. |
|--------------|-------------------------------------------|------------------------|-------------------------------|--------------------|------------|-----------------------------------|
| <b>Asia</b>  |                                           |                        |                               |                    |            |                                   |
| <b>China</b> |                                           |                        |                               |                    |            |                                   |
| Xinjing      | <i>Brassica oleracea</i>                  | Cabbage                | -, Xinjiang                   | 1963               | [1], [2]   | AF140604 (Full)                   |
| <b>Iran</b>  |                                           |                        |                               |                    |            |                                   |
| Ca-BE39      | <i>B. oleracea</i> var. <i>italica</i>    | Broccoli               | -, Esfahan                    | 2004               |            | DQ870913 (partial ORF VI)         |
| Ca-CAz22     | <i>B. oleracea</i> var. <i>botrytis</i>   | Cauliflower            | Orumiyeh, Azarbayjan-e-Gharbi | 2004               | [3]        | DQ870907 (partial ORF VI)         |
| Ca-CAz26     | <i>B. oleracea</i> var. <i>botrytis</i>   | Cauliflower            | Orumiyeh, Azarbayjan-e-Gharbi | 2004               | [3]        | DQ870908 (partial ORF VI)         |
| Ca-Cbz10     | <i>B. oleracea</i> var. <i>capitata</i>   | Cabbage                | -, Zanjan                     | 2004               |            | DQ870909 (partial ORF VI)         |
| Ca-Cbz26     | <i>B. oleracea</i> var. <i>capitata</i>   | Cabbage                | -, Zanjan                     | 2004               |            | DQ870911 (partial ORF VI)         |
| Ca-CE1       | <i>B. oleracea</i> var. <i>botrytis</i>   | Cauliflower            | -, Esfahan                    | 2003               | [3]        | DQ119041 (partial ORF VI)         |
| Ca-CKh19     | <i>B. oleracea</i> var. <i>botrytis</i>   | Cauliflower            | -, Khorasan                   | 2004               | [3]        | DQ870910 (partial ORF VI)         |
| Ca-CSH1      | <i>B. oleracea</i> var. <i>botrytis</i>   | Cauliflower            | Shiraz, Fars                  | 2003               | [3]        | DQ119040 (partial ORF VI)         |
| Ca-CQ50      | <i>B. oleracea</i> var. <i>botrytis</i>   | Cauliflower            | -, Qazvin                     | 2004               | [3]        | DQ870914 (partial ORF VI)         |
| Ca-CT4       | <i>B. oleracea</i> var. <i>botrytis</i>   | Cauliflower            | Varamin, Tehran               | 2004               | [3]        | DQ870912 (partial ORF VI)         |
| Ca-CT22      | <i>B. oleracea</i> var. <i>botrytis</i>   | Cauliflower            | Karaj, Tehran                 | 2004               | [3]        | DQ870915 (partial ORF VI)         |
| Ca-Kh32      | <i>B. oleracea</i> var. <i>botrytis</i>   | Cauliflower            | -, Khorasan                   | 2004               | [3]        | EF503597 (partial ORF VI)         |
| Ca-RT66      | <i>R. sativus</i>                         | Radish                 | Karaj, Tehran                 | 2004               |            | DQ870918 (partial ORF VI)         |
| Ca-TM65      | <i>B. rapa</i>                            | Turnip                 | Mahallat, Markazi             | 2005               |            | DQ870917 (partial ORF VI)         |
| Ca-TT56      | <i>B. rapa</i>                            | Turnip                 | Karaj, Tehran                 | 2004               |            | DQ870919 (partial ORF VI)         |
| Ca-TY61      | <i>B. rapa</i>                            | Turnip                 | Meybod, Yazd                  | 2004               |            | DQ870916 (partial ORF VI)         |
| HC63         | <i>B. napus</i>                           | Oilseed rape           | Razan, Hamedan                | 2012               | [4]        | KF015282 (ORF VI)                 |
| HRA4         | <i>R. rogusum</i>                         | Annual bastard cabbage | Hamedan, Hamedan              | 2012               | [4]        | KF015283 (ORF VI)                 |
| IC1          | <i>B. napus</i>                           | Oilseed rape           | Ilam, Ilam                    | 2012               | [4]        | KF015284 (ORF VI)                 |
| IRN1         | <i>B. oleracea</i> var. <i>botrytis</i>   | Cauliflower            | Uromia, Azarbayjan-e-Gharbi   | 2003               | this study | AB863136 (Full)                   |
| IRN2         | <i>B. oleracea</i> var. <i>botrytis</i>   | Cauliflower            | Uromia, Azarbayjan-e-Gharbi   | 2003               | this study | AB863137 (Full)                   |
| IRN3         | <i>B. oleracea</i> var. <i>botrytis</i>   | Cauliflower            | -, Qazvin                     | 2003               | this study | AB863138 (Full)                   |
| IRN4         | <i>B. oleracea</i> var. <i>botrytis</i>   | Cauliflower            | Varamin, Tehran               | 2003               | this study | AB863139 (Full)                   |
| IRN5         | <i>B. pekinensis</i>                      | Chinese cabbage        | Karaj, Tehran                 | 2003               | this study | AB863140 (Full)                   |
| IRN6         | <i>B. oleracea</i> var. <i>italica</i>    | Broccoli               | Falavarjan, Esfahan           | 2003               | this study | AB863141 (Full)                   |
| IRN7         | <i>B. oleracea</i> var. <i>botrytis</i>   | Cauliflower            | Karaj, Tehran                 | 2004               | this study | AB863142 (Full)                   |
| IRN8         | <i>Matthiola</i> sp.                      | Stock                  | Mahallat, Markazi             | 2004               | this study | AB863143 (Full)                   |
| IRN9         | <i>B. rapa</i>                            | Turnip                 | Mahallat, Markazi             | 2004               | this study | AB863144 (Full)                   |
| IRN10        | <i>Raphanus rugosum</i>                   | Annual bastard cabbage | Vavan, Tehran                 | 2006               | this study | AB863145 (Full)                   |
| IRN11        | <i>B. napus</i>                           | Oilseed rape           | Shiraz, Fars                  | 2006               | this study | AB863146 (Full)                   |
| IRN12        | <i>R. rogusum</i>                         | Annual bastard cabbage | Vavan, Tehran                 | 2006               | this study | AB863147 (Full)                   |
| IRN13        | <i>R. sativus</i>                         | Radish                 | -, Yazd                       | 2006               | this study | AB863148 (Full)                   |
| IRN14        | <i>B. oleracea</i> var. <i>botrytis</i>   | Cauliflower            | Falavarjan, Esfahan           | 2007               | this study | AB863149 (Full)                   |
| IRN15        | <i>Lepidium sativum</i>                   | Garden cress           | Mashhad, Khorasan Razavi      | 2007               | this study | AB863150 (Full)                   |
| IRN16        | <i>R. sativus</i>                         | Radish                 | Mashhad, Khorasan Razavi      | 2007               | this study | AB863151 (Full)                   |
| IRN17        | <i>R. sativus</i>                         | Radish                 | Mashhad, Khorasan Razavi      | 2007               | this study | AB863152 (Full)                   |
| IRN18        | <i>R. sativus</i>                         | Radish                 | Shiraz, Fars                  | 2007               | this study | AB863153 (Full)                   |
| IRN19        | <i>B. oleracea</i> var. <i>gongylodes</i> | Kohlrabi               | Shiraz, Fars                  | 2007               | this study | AB863154 (Full)                   |
| IRN20        | <i>B. rapa</i>                            | Turnip                 | Mashhad, Khorasan Razavi      | 2007               | this study | AB863155 (Full)                   |
| IRN21        | <i>R. sativus</i>                         | Radish                 | -, Esfahan                    | 2008               | this study | AB863156 (Full)                   |
| IRNCaCOr1    | <i>B. oleracea</i> var. <i>botrytis</i>   | Cauliflower            | Uromia, Azarbayjan-e-Gharbi   | 2004               |            | DQ119036 (ORF II)                 |
| IRNCaCQ1     | <i>B. oleracea</i> var. <i>botrytis</i>   | Cauliflower            | Boin-zahra, Qazvin            | 2001               |            | DQ119038 (ORF II)                 |
| IRNCaCSH1    | <i>B. oleracea</i> var. <i>botrytis</i>   | Cauliflower            | Shiraz, Fars                  | 2003               |            | DQ119039 (ORF II)                 |
| IRNCaME1     | <i>B. oleracea</i> var. <i>italica</i>    | Broccoli               | -, Esfahan                    | 2003               |            | AY703456 (ORF II)                 |
| IRNCaRE4     | <i>R. sativus</i>                         | Radish                 | -, Esfahan                    | 2003               |            | DQ119037 (ORF II)                 |
| KEC17        | <i>B. napus</i>                           | Oilseed rape           | Kermanshah, Kermanshah        | 2012               | [4]        | KF015285 (ORF VI)                 |
| KORc1        | <i>B. napus</i>                           | Oilseed rape           | -, Kordestan                  | 2012               | [4]        | KF015287 (ORF VI)                 |
| LC11         | <i>B. napus</i>                           | Oilseed rape           | Koram abad, Lorestan          | 2012               | [4]        | KF015288 (ORF VI)                 |
| LR9          | <i>R. sativus</i>                         | Radish                 | Koram abad, Lorestan          | 2012               | [4]        | KF015286 (ORF VI)                 |
| TuE24        | <i>B. rapa</i>                            | Turnip                 | -, Esfahan                    | 2012               | [4]        | KF015289 (ORF VI)                 |
| WKBi7        | <i>B. oleracea</i> var. <i>capitata</i>   | White cabbage          | Birjand, Khorasan-e-Jonubi    | 2012               | [4]        | KF015294 (ORF VI)                 |
| WKBi32       | <i>B. oleracea</i> var. <i>capitata</i>   | White cabbage          | Birjand, Khorasan-e-Jonubi    | 2012               | [4]        | KF015295 (ORF VI)                 |
| WKB13        | <i>B. oleracea</i> var. <i>capitata</i>   | White cabbage          | Bohnurd, Khorasan-e-Shomali   | 2012               | [4]        | KF015290 (ORF VI)                 |
| WKB15        | <i>B. oleracea</i> var. <i>capitata</i>   | White cabbage          | Bohnurd, Khorasan-e-Shomali   | 2010               | [4]        | KF015291 (ORF VI)                 |
| WKB17        | <i>B. oleracea</i> var. <i>capitata</i>   | White cabbage          | Bohnurd, Khorasan-e-Shomali   | 2010               | [4]        | KF015292 (ORF VI)                 |
| WKB63        | <i>B. oleracea</i> var. <i>capitata</i>   | White cabbage          | Bohnurd, Khorasan-e-Shomali   | 2012               | [4]        | KF015293 (ORF VI)                 |
| ZC20         | <i>B. napus</i>                           | Oilseed rape           | -, Zanjan                     | 2012               | [4]        | KF015296 (ORF VI)                 |
| <b>Japan</b> |                                           |                        |                               |                    |            |                                   |
| JPNHGB340    | <i>B. oleracea</i>                        | Cabbage                | -, Hyogo                      | 2010               | this study | AB863157 (Full)                   |
| JPNKWB778    | <i>B. oleracea</i> var. <i>italica</i>    | Broccoli               | Takamatsu, Kagawa             | 2004               | this study | AB863158 (Full)                   |
| JPNM         | <i>B. oleracea</i>                        | Cabbage                | -, Tokyo                      | 1960               | this study | AB863159 (Full)                   |
| JPNN         | <i>B. oleracea</i>                        | Cabbage                | Sendai, Miyagi                | 2008               | this study | AB863160 (Full)                   |
| JPNS1        | <i>Armoracia rusticana</i>                | Horseradish            | -, Nagano                     | 1965               | this study | AB863161 (Full)                   |
| JPNS2        | <i>A. rusticana</i>                       | Horseradish            | -, Nagano                     | 1965               | this study | AB863162 (Full)                   |
| JPNTKD762    | <i>R. sativus</i>                         | Radish                 | Miyoshi, Tokushima            | 2002               | this study | AB863163 (Full)                   |
| JPNUV1       | <i>B. oleracea</i>                        | Cabbage                | -, Ibaraki                    | 1981               | this study | AB863164 (Full)                   |
| JPNUV26      | <i>B. oleracea</i>                        | Cabbage                | -, Ibaraki                    | 1981               | this study | AB863165 (Full)                   |
| S-Japan      | <i>A. rusticana</i>                       | Horseradish            | Yokohama, Kanagawa            | Not known          | [5]        | X14911 (ORF VI)                   |

[1] Xie *et al.*, 1979, [2] Fang *et al.*, 1985, [3] Farzadfar *et al.*, 2007, [4] Farzadfar and Pourrahim, 2013, [5] Takahashi *et al.*, 1989, [6] Pique *et al.*, 1995, [7] Howarth *et al.*, 1981, [8] Stratford and Plaskitt, 1988, [9] Franck *et al.*, 1980, [10] Chenault and Melcher, 1993a, [11] Vaden and Melcher, 1990, [12] Geri *et al.*, 2004, [13] Shalla *et al.*, 1980, [14] Gardner *et al.*, 1981, [15] Chenault and Melcher, 1993b, [16] Daubert and Routh, 1990, [17] Chenault *et al.*, 1992, [18] Volovitch and Modjtahedi 1990, [19] Qiu and Schoelz, 1992, [20] Wintermantel *et al.*, 1993

Table S1. Continued.

| Isolate              | Original host                           | Common name          | Location (city, district) | Year of collection | Reference  | Sequenced region or Accession no.                         |
|----------------------|-----------------------------------------|----------------------|---------------------------|--------------------|------------|-----------------------------------------------------------|
| <b>Turkey</b>        |                                         |                      |                           |                    |            |                                                           |
| TUR1                 | <i>B. oleracea</i> var. <i>botrytis</i> | Cauliflower          | Canakkale, Marmora        | 2006               | this study | AB863166 (Full)                                           |
| TUR2                 | <i>B. oleracea</i>                      | Cabbage              | Balikesir, Marmora        | 2006               | this study | AB863167 (Full)                                           |
| TUR4                 | <i>R. sativus</i>                       | Radish               | Balikesir, Marmora        | 2006               | this study | AB863168 (Full)                                           |
| TUR5                 | <i>B. oleracea</i>                      | Cabbage              | Canakkale, Marmora        | 2006               | this study | AB863169 (Full)                                           |
| TUR12                | <i>B. oleracea</i>                      | Cabbage              | Konya, Center Anatolia    | 2007               | this study | AB863170 (Full)                                           |
| TUR34                | <i>B. oleracea</i>                      | Cabbage              | Aksaray, Center Anatolia  | 2007               | this study | AB863171 (Full)                                           |
| TUR50                | <i>B. oleracea</i>                      | Cabbage              | Nigde, Center Anatolia    | 2007               | this study | AB863172 (Full)                                           |
| TUR59                | <i>B. oleracea</i>                      | Cabbage              | Bursa, Marmora            | 2007               | this study | AB863173 (Full)                                           |
| TUR69                | <i>B. oleracea</i> var. <i>botrytis</i> | Cauliflower          | Bursa, Marmora            | 2007               | this study | AB863174 (Full)                                           |
| TUR81                | <i>B. oleracea</i>                      | Cabbage              | Bursa, Marmora            | 2007               | this study | AB863175 (Full)                                           |
| TUR84                | <i>B. oleracea</i>                      | Cabbage              | Bursa, Marmora            | 2007               | this study | AB863176 (Full)                                           |
| TUR94                | <i>B. oleracea</i>                      | Cabbage              | Canakkale, Marmora        | 2007               | this study | AB863177 (Full)                                           |
| TUR213               | <i>B. oleracea</i> var. <i>botrytis</i> | Cauliflower          | Izmir, Aegean             | 2007               | this study | AB863178 (Full)                                           |
| TUR214               | <i>B. oleracea</i> var. <i>botrytis</i> | Cauliflower          | Izmir, Aegean             | 2007               | this study | AB863179 (Full)                                           |
| TUR216               | <i>B. oleracea</i> var. <i>botrytis</i> | Cauliflower          | Izmir, Aegean             | 2007               | this study | AB863180 (Full)                                           |
| TUR220               | <i>B. oleracea</i> var. <i>botrytis</i> | Cauliflower          | Aydin, Aegean             | 2007               | this study | AB863181 (Full)                                           |
| TUR239               | <i>B. oleracea</i> var. <i>botrytis</i> | Cauliflower          | Canakkale, Marmora        | 2007               | this study | AB863182 (Full)                                           |
| TUR244               | <i>B. oleracea</i> var. <i>botrytis</i> | Cauliflower          | Balikesir, Marmora        | 2007               | this study | AB863183 (Full)                                           |
| TUR249               | <i>B. oleracea</i> var. <i>botrytis</i> | Cauliflower          | Balikesir, Marmora        | 2007               | this study | AB863184 (Full)                                           |
| TUR263               | <i>B. oleracea</i> var. <i>botrytis</i> | Cauliflower          | Canakkale, Marmora        | 2007               | this study | AB863185 (Full)                                           |
| TUR278               | <i>B. oleracea</i> var. <i>botrytis</i> | Cauliflower          | Balikesir, Marmora        | 2007               | this study | AB863186 (Full)                                           |
| TUR279               | <i>B. oleracea</i> var. <i>botrytis</i> | Cauliflower          | Balikesir, Marmora        | 2007               | this study | AB863187 (Full)                                           |
| TUR285               | <i>B. oleracea</i> var. <i>botrytis</i> | Cauliflower          | Bursa, Marmora            | 2007               | this study | AB863188 (Full)                                           |
| TUR289               | <i>B. oleracea</i> var. <i>italica</i>  | Broccoli             | Bursa, Marmora            | 2007               | this study | AB863189 (Full)                                           |
| TUR303               | <i>B. oleracea</i> var. <i>botrytis</i> | Cauliflower          | Umurbey, Tekirdag         | 2008               | this study | AB863190 (Full)                                           |
| TUR306               | <i>B. oleracea</i> var. <i>botrytis</i> | Cauliflower          | -, Center Anatolia        | 2008               | this study | AB863191 (Full)                                           |
| <b>Europe</b>        |                                         |                      |                           |                    |            |                                                           |
| <b>Croatia</b>       |                                         |                      |                           |                    |            |                                                           |
| CRO180A              | <i>B. napus</i>                         | Oilseed rape         | Zagreb, -                 | 2009               | this study | AB863192 (Full)                                           |
| <b>France</b>        |                                         |                      |                           |                    |            |                                                           |
| B29                  | <i>B. oleracea</i> var. <i>botrytis</i> | Cauliflower          | Rennes, Ille-et-Vilaine   | Not known          | [6]        | X79465 (Full)                                             |
| <b>Greece</b>        |                                         |                      |                           |                    |            |                                                           |
| GRC83                | <i>B. oleracea</i> var. <i>italica</i>  | Broccoli             | Dytiko, Pella             | 2008               | this study | AB863193 (Full)                                           |
| GRC84B               | <i>B. oleracea</i> var. <i>italica</i>  | Broccoli             | Dytiko, Pella             | 2008               | this study | AB863194 (Full)                                           |
| GRC86B               | <i>R. sativus</i>                       | Radish               | Athyra, Pella             | 2008               | this study | AB863195 (Full)                                           |
| GRC86D               | <i>R. sativus</i>                       | Radish               | Athyra, Pella             | 2008               | this study | AB863196 (Full)                                           |
| GRC87E               | <i>B. oleracea</i> var. <i>botrytis</i> | Cauliflower          | Ionia, Thessaloniki       | 2008               | this study | AB863197 (Full)                                           |
| GRC87G               | <i>B. oleracea</i> var. <i>botrytis</i> | Cauliflower          | Ionia, Thessaloniki       | 2008               | this study | AB863198 (Full)                                           |
| GRC91B               | <i>B. oleracea</i> var. <i>botrytis</i> | Cauliflower          | Epanomi, Thessaloniki     | 2008               | this study | AB863199 (Full)                                           |
| GRC92A               | <i>B. oleracea</i> var. <i>italica</i>  | Broccoli             | Epanomi, Thessaloniki     | 2008               | this study | AB863200 (Full)                                           |
| GRC92C               | <i>B. oleracea</i> var. <i>italica</i>  | Broccoli             | Epanomi, Thessaloniki     | 2008               | this study | AB863201 (Full)                                           |
| GRC92D               | <i>B. oleracea</i> var. <i>botrytis</i> | Cauliflower          | Epanomi, Thessaloniki     | 2008               | this study | AB863202 (Full)                                           |
| <b>Hungary</b>       |                                         |                      |                           |                    |            |                                                           |
| D/H                  | <i>B. oleracea</i>                      | Cabbage              | Budapest, Budapest        | Not known          | [7]        | M10376 (Full)                                             |
| <b>Italy</b>         |                                         |                      |                           |                    |            |                                                           |
| Bari 1               | <i>Brassica campestris-rapa</i> L.      | Perennial wallrocket | Bari, Puglia              | Not known          | [8]        | D00335 (ORF VI)                                           |
| Cabbage S            | <i>B. ruvo</i>                          | Ruvo kale            | Bari, Puglia              | Not known          | [9]        | V00141 (Full)                                             |
| <b>North America</b> |                                         |                      |                           |                    |            |                                                           |
| <b>U. S. A</b>       |                                         |                      |                           |                    |            |                                                           |
| BBC                  | <i>B. rapa</i> var. <i>chinensis</i>    | Pak Choi             | -, California             | 1988               | [10]       | M90542 (Full)                                             |
| Cabb B-JI            | <i>Brassica</i> sp.                     |                      | -, Wisconsin              | Not known          | [11], [12] | DQ211685 (ORF VI), M32813 (ORF III)                       |
| Campbell             | <i>B. oleracea</i> var. <i>botrytis</i> | Cauliflower          | -, California             | Not known          | [13]       | M17415 (ORF I)                                            |
| CM1841               | <i>Brassica</i> sp.                     | Turnip               | -, California             | 1967               | [14]       | V00140 (Full)                                             |
| CMV-1                | Not known                               |                      | -, California             | Not known          | [15]       | M90543 (Full)                                             |
| D4                   | <i>B. rapa</i>                          | Turnip               | -, California             | Not known          | [16]       | M23620 (ORF VI)                                           |
| NY8153               | <i>B. oleracea</i> var. <i>botrytis</i> | Cauliflower          | -, New York               | Not known          | [17]       | M90541 (Full)                                             |
| PV147                | <i>B. rapa</i>                          | Not known            | -, Wisconsin              | Not known          | [18]       | M37581 (ORF II), X53860 (ORF VI)                          |
| <b>South America</b> |                                         |                      |                           |                    |            |                                                           |
| <b>Argentina</b>     |                                         |                      |                           |                    |            |                                                           |
| W260                 | Not known                               |                      | -, Mendoza                | 1985               | [19], [20] | M94887 (ORF I, ORF VII), L09053 (ORF VI), JF809616 (Full) |

Table S2. Detailed results from BEAST analyses of *Cauliflower mosaic virus*.

| Model               |                    | Marginal likelihood | Bayes factor | TMRCA (95% HPD lower-upper) | Substitution Rate (subs/site/year) | 95% HPD Rate-lower (subs/site/year) | 95% HPD Rate-upper (subs/site/year) | Population Size    | 95% HPD Population Size (lower, upper) | Population Growth Rate | 95% HDP Growth Rate (lower, upper)         |
|---------------------|--------------------|---------------------|--------------|-----------------------------|------------------------------------|-------------------------------------|-------------------------------------|--------------------|----------------------------------------|------------------------|--------------------------------------------|
| ORFs I-V            |                    |                     |              |                             |                                    |                                     |                                     |                    |                                        |                        |                                            |
| Strict clock        | Constant Size      | -25503.665          | -            | 2052 (457 - 4697)           | $4.25 \times 10^{-5}$              | $2.45 \times 10^{-6}$               | $7.81 \times 10^{-5}$               | $1.16 \times 10^4$ | $2.24 \times 10^3, 2.69 \times 10^4$   | N/A                    | N/A                                        |
|                     | Expansion Growth   | -25503.434          | 1.26E+00     | 1163 (440 - 2298)           | $5.18 \times 10^{-5}$              | $1.39 \times 10^{-5}$               | $8.95 \times 10^{-5}$               | $2.73 \times 10^4$ | $6.94 \times 10^3, 5.92 \times 10^4$   | $8.01 \times 10^{-3}$  | $1.30 \times 10^{-3}, 1.46 \times 10^{-2}$ |
|                     | Exponential Growth | -25503.301          | 1.44E+00     | 1057 (433 - 2086)           | $5.28 \times 10^{-5}$              | $1.67 \times 10^{-5}$               | $8.76 \times 10^{-5}$               | $2.04 \times 10^4$ | $6.60 \times 10^3, 4.22 \times 10^4$   | $6.41 \times 10^{-3}$  | $1.92 \times 10^{-3}, 1.09 \times 10^{-2}$ |
|                     | Bayesian Skyline   | -25503.692          | 9.74E-01     | 4383 (359 - 10271)          | $3.53 \times 10^{-5}$              | $3.39 \times 10^{-8}$               | $7.29 \times 10^{-5}$               | $3.05 \times 10^4$ | $3.02 \times 10^3, 7.70 \times 10^4$   | N/A                    | N/A                                        |
| Relaxed Exponential | Constant Size      | -25410.037          | 4.59E+40     | 2998 (71 - 5677)            | $2.48 \times 10^{-4}$              | $1.48 \times 10^{-8}$               | $6.95 \times 10^{-4}$               | $7.75 \times 10^3$ | $1.16 \times 10^2, 1.13 \times 10^4$   | N/A                    | N/A                                        |
|                     | Expansion Growth   | -25411.092          | 1.60E+40     | 634 (108 - 1687)            | $1.69 \times 10^{-4}$              | $9.62 \times 10^{-6}$               | $3.72 \times 10^{-4}$               | $1.41 \times 10^4$ | $1.01 \times 10^3, 3.92 \times 10^4$   | $2.23 \times 10^{-2}$  | $1.30 \times 10^{-3}, 4.87 \times 10^{-2}$ |
|                     | Exponential Growth | -25404.395          | 1.30E+43     | 491 (86 - 1260)             | $1.71 \times 10^{-4}$              | $1.45 \times 10^{-5}$               | $3.87 \times 10^{-4}$               | $1.24 \times 10^4$ | $5.25 \times 10^2, 3.40 \times 10^4$   | $1.69 \times 10^{-2}$  | $1.66 \times 10^{-3}, 3.70 \times 10^{-2}$ |
|                     | Bayesian Skyline   | -25409.932          | 5.10E+40     | 1438 (77 - 2822)            | $1.75 \times 10^{-4}$              | $1.92 \times 10^{-7}$               | $4.29 \times 10^{-4}$               | $8.95 \times 10^4$ | $4.50 \times 10^1, 1.99 \times 10^4$   | N/A                    | N/A                                        |
| Relaxed Lognormal   | Constant Size      | -25412.128          | 5.67E+39     | 2649 (216 - 6083)           | $5.37 \times 10^{-5}$              | $1.24 \times 10^{-7}$               | $1.14 \times 10^{-4}$               | $1.26 \times 10^4$ | $9.14 \times 10^2, 2.91 \times 10^4$   | N/A                    | N/A                                        |
|                     | Expansion Growth   | -25411.496          | 1.07E+40     | 904 (245 - 1920)            | $7.45 \times 10^{-5}$              | $1.56 \times 10^{-5}$               | $1.38 \times 10^{-4}$               | $1.96 \times 10^4$ | $4.04 \times 10^3, 4.43 \times 10^4$   | $1.04 \times 10^{-2}$  | $1.72 \times 10^{-3}, 2.08 \times 10^{-2}$ |
|                     | Exponential Growth | -25411.528          | 1.03E+40     | 848 (274 - 740)             | $7.21 \times 10^{-5}$              | $1.59 \times 10^{-5}$               | $1.31 \times 10^{-4}$               | $1.77 \times 10^4$ | $4.31 \times 10^3, 3.85 \times 10^4$   | $8.33 \times 10^{-3}$  | $1.22 \times 10^{-3}, 1.55 \times 10^{-2}$ |
|                     | Bayesian Skyline   | -25413.313          | 1.73E+39     | 3565 (217 - 9665)           | $5.62 \times 10^{-5}$              | $3.38 \times 10^{-8}$               | $1.28 \times 10^{-4}$               | $2.38 \times 10^4$ | $1.48 \times 10^2, 6.60 \times 10^4$   | N/A                    | N/A                                        |
| ORF VI              |                    |                     |              |                             |                                    |                                     |                                     |                    |                                        |                        |                                            |
| Strict clock        | Constant Size      | -7092.584           | 1.20E+00     | 1687 (784 - 2875)           | $1.20 \times 10^{-4}$              | $5.35 \times 10^{-5}$               | $1.94 \times 10^{-4}$               | $1.08 \times 10^3$ | $4.52 \times 10^2, 1.94 \times 10^3$   | N/A                    | N/A                                        |
|                     | Expansion Growth   | -7090.175           | 1.35E+01     | 2179 (886 - 4086)           | $9.51 \times 10^{-5}$              | $3.31 \times 10^{-5}$               | $1.59 \times 10^{-4}$               | $4.10 \times 10^3$ | $8.73 \times 10^2, 4.09 \times 10^3$   | $3.15 \times 10^{-2}$  | $7.97 \times 10^{-3}, 5.89 \times 10^{-2}$ |
|                     | Exponential Growth | -7092.774           | -            | 1489 (738 - 2447)           | $1.28 \times 10^{-4}$              | $6.27 \times 10^{-5}$               | $2.00 \times 10^{-4}$               | $1.04 \times 10^3$ | $4.61 \times 10^2, 1.80 \times 10^3$   | $1.01 \times 10^{-3}$  | $4.00 \times 10^{-4}, 2.52 \times 10^{-3}$ |
|                     | Bayesian Skyline   | -7090.555           | 9.20E+00     | 1911 (781 - 3698)           | $1.08 \times 10^{-4}$              | $3.44 \times 10^{-5}$               | $1.79 \times 10^{-4}$               | $1.50 \times 10^3$ | $7.50 \times 10^1, 3.98 \times 10^3$   | N/A                    | N/A                                        |
| Relaxed Exponential | Constant Size      | -6992.577           | 3.28E+43     | 431 (113 - 886)             | $5.81 \times 10^{-4}$              | $2.47 \times 10^{-4}$               | $9.47 \times 10^{-4}$               | $2.16 \times 10^2$ | $8.70 \times 10^1, 3.94 \times 10^2$   | N/A                    | N/A                                        |
|                     | Expansion Growth   | -6992.859           | 2.47E+43     | 404 (101 - 823)             | $4.91 \times 10^{-4}$              | $1.96 \times 10^{-4}$               | $8.41 \times 10^{-4}$               | $4.14 \times 10^2$ | $9.20 \times 10^1, 1.03 \times 10^3$   | $3.06 \times 10^{-2}$  | $9.14 \times 10^{-8}, 8.16 \times 10^{-2}$ |
|                     | Exponential Growth | -6992.439           | 3.76E+43     | 292 (113 - 565)             | $5.81 \times 10^{-4}$              | $2.32 \times 10^{-4}$               | $9.47 \times 10^{-4}$               | $2.51 \times 10^2$ | $8.80 \times 10^1, 4.78 \times 10^2$   | $5.66 \times 10^{-3}$  | $3.20 \times 10^{-3}, 1.59 \times 10^{-2}$ |
|                     | Bayesian Skyline   | -6993.657           | 1.11E+43     | 447 (106 - 931)             | $4.93 \times 10^{-4}$              | $1.87 \times 10^{-4}$               | $8.64 \times 10^{-4}$               | $3.20 \times 10^2$ | $1.30 \times 10^1, 8.47 \times 10^2$   | N/A                    | N/A                                        |
| Relaxed Lognormal   | Constant Size      | -7000.845           | 8.40E+39     | 533 (96 - 1134)             | $5.03 \times 10^{-4}$              | $1.66 \times 10^{-4}$               | $9.37 \times 10^{-4}$               | $2.85 \times 10^2$ | $8.60 \times 10^1, 5.25 \times 10^2$   | N/A                    | N/A                                        |
|                     | Expansion Growth   | -7002.750           | 1.25E+39     | 645 (111 - 1370)            | $3.49 \times 10^{-4}$              | $8.72 \times 10^{-5}$               | $7.09 \times 10^{-4}$               | $1.00 \times 10^3$ | $9.30 \times 10^1, 2.45 \times 10^3$   | $3.75 \times 10^{-2}$  | $6.73 \times 10^{-6}, 8.32 \times 10^{-2}$ |
|                     | Exponential Growth | -7000.228           | 1.56E+40     | 306 (89 - 672)              | $4.71 \times 10^{-4}$              | $1.77 \times 10^{-4}$               | $8.37 \times 10^{-4}$               | $3.71 \times 10^2$ | $1.15 \times 10^2, 6.88 \times 10^2$   | $8.14 \times 10^{-3}$  | $1.90 \times 10^{-4}, 2.06 \times 10^{-2}$ |
|                     | Bayesian Skyline   | -7006.522           | 2.88E+37     | 527 (98 - 1128)             | $3.86 \times 10^{-4}$              | $1.51 \times 10^{-4}$               | $6.68 \times 10^{-4}$               | $4.10 \times 10^2$ | $1.70 \times 10^1, 1.06 \times 10^3$   | N/A                    | N/A                                        |

<sup>a</sup> Not applicable



## Supporting Information References

1. Xie H, Li S, Li W, Ni S, Li Y (1979) A preliminary study of Cauliflower mosaic virus strain 63-3. *Acta Microbiol Sinica* 19:52-56.
2. Fang R, Wu X, Bu M, Tian Y, Cai F, et al. (1985) Complete nucleotide sequence of *Cauliflower mosaic virus* (Xinjiang isolate) genomic DNA. *Chin J Virol* 1: 247-256.
3. Farzadfar S, Ahoonmanesh A, Mosahebi GM, Ohshima K, et al. (2007) Partial Biological and Molecular Characterization of *Cauliflower mosaic virus* Isolates in Iran. *Plant Pathol J* 6:291-298.
4. Farzadfar S, Pourrahim R (2013) Biological and molecular variation of Iranian *Cauliflower mosaic virus* (CaMV) isolates. *Virus Genes* 47:347-356.
5. Takahashi H, Shimamoto K, Suzuki M, Ehara Y (1989) DNA sequence of gene VI of cauliflower mosaic virus Japanese strain S ( CaMV S-Japan ). *Nucleic Acids Res* 17:7981.
6. Piqué M, Mougeot JL, Geldreich A, Guidasci T, Mesnard JM, et al. (1995) Sequence of a cauliflower mosaic virus strain infecting solanaceous plants. *Gene* 155:305-306.
7. Howarth AJ, Gardner RC, Messing J, Shepherd RJ (1981) Nucleotide sequence of naturally occurring deletion mutants of Cauliflower mosaic virus. *Virology* 635:678-685.
8. Stratford R, Plaskitt KA (1988) Molecular properties of Bari 1, a mild strain of Cauliflower mosaic virus. *J Gen Virol* 69:2375-2386.
9. Franck A, Guilley H, Jonard G, Richards K, Hirth L (1980) Nucleotide sequence of Cauliflower mosaic virus DNA. *Cell* 21:285-294.
10. Chenault KD, Melcher U (1993) The complete nucleotide sequence of cauliflower mosaic virus isolate BBC. *Gene* 123:255-257.
11. Vaden VR, Melcher U (1990) Recombination implications sites in Cauliflower

- mosaic virus DNAs : for mechanisms of recombination. *Virology* 726:717-726.
12. Geri C, Love AJ, Cecchini E, Barrett SJ, Laird J, et al. (2004) Arabidopsis mutants that suppress the phenotype induced by transgene-mediated expression of cauliflower mosaic virus (CaMV) gene VI are less susceptible to CaMV-infection and show reduced ethylene sensitivity. *Plant Mol Biol* 56:111–124.
  13. Shalla TA, Shepherd RJ, Petersen LJ (1980) Comparative cytology of nine isolates of Cauliflower mosaic virus. *Virology* 388:381-388.
  14. Gardner RC, Howarth AJ, Hahn P, Brown-luedi M, et al. (1981) The complete nucleotide sequence of an infectious clone of cauliflower mosaic virus by M13mp7 shotgun sequencing. *Nucleic Acids Res* 9:2871–2888.
  15. Chenault KD, Melcher U (1993) Cauliflower mosaic virus isolate CMV-1. *Plant Physiol* 101:1395-1396.
  16. Daubert S, Routh G. 1990. Point mutations in Cauliflower mosaic virus gene VI confer host-specific symptom changes. *Mol Plant-Microbe Interact* 3:341-345.
  17. Chenault KD, Steffens DL, Melcher U (1992) Nucleotide sequence of Cauliflower mosaic virus isolate NY8153. *Plant Physiol* 100:542-545.
  18. Volovitch M, Modjtahedi N (1990) DNA sequence of gene VI of cauliflower mosaic virus strain PV147. *Nucleic Acids Res* 18:5297.
  19. Qiu SG, Schoelz JE (1992) Three regions of cauliflower mosaic virus strain W260 are involved in systemic infection of solanaceous hosts. *Virology* 190:773–782.
  20. Wintermantel WM, Anderson EJ, Schoelz JE (1993) Identification of domains within gene VI of cauliflower mosaic virus that influence systemic infection of *Nicotiana bigelovii* in a light-dependent manner. *Virology* 798:789–798.
